# Supplementary material for: A European-wide 222 radon and 222 radon progeny comparison study
Source: Copernicus journal article supplement (doi:10.5194/amt-10-1299-2017), 2017-04-03
Supplement: Supplementary file 1 [file amt-10-1299-2017-supplement.pdf]

Supplement of Atmos. Meas. Tech., 10, 1299–1312, 2017  
<http://www.atmos-meas-tech.net/10/1299/2017/>  
doi:10.5194/amt-10-1299-2017-supplement  
© Author(s) 2017. CC Attribution 3.0 License.

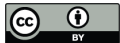

*Supplement of*

## **A European-wide $^{222}\text{Rn}$ and $^{222}\text{Rn}$ progeny comparison study**

**Dominik Schmithüsen et al.**

*Correspondence to:* Ingeborg Levin ([ingeborg.levin@iup.uni-heidelberg.de](mailto:ingeborg.levin@iup.uni-heidelberg.de))

The copyright of individual parts of the supplement might differ from the CC-BY 3.0 licence.

Cabauw 180m, 2012

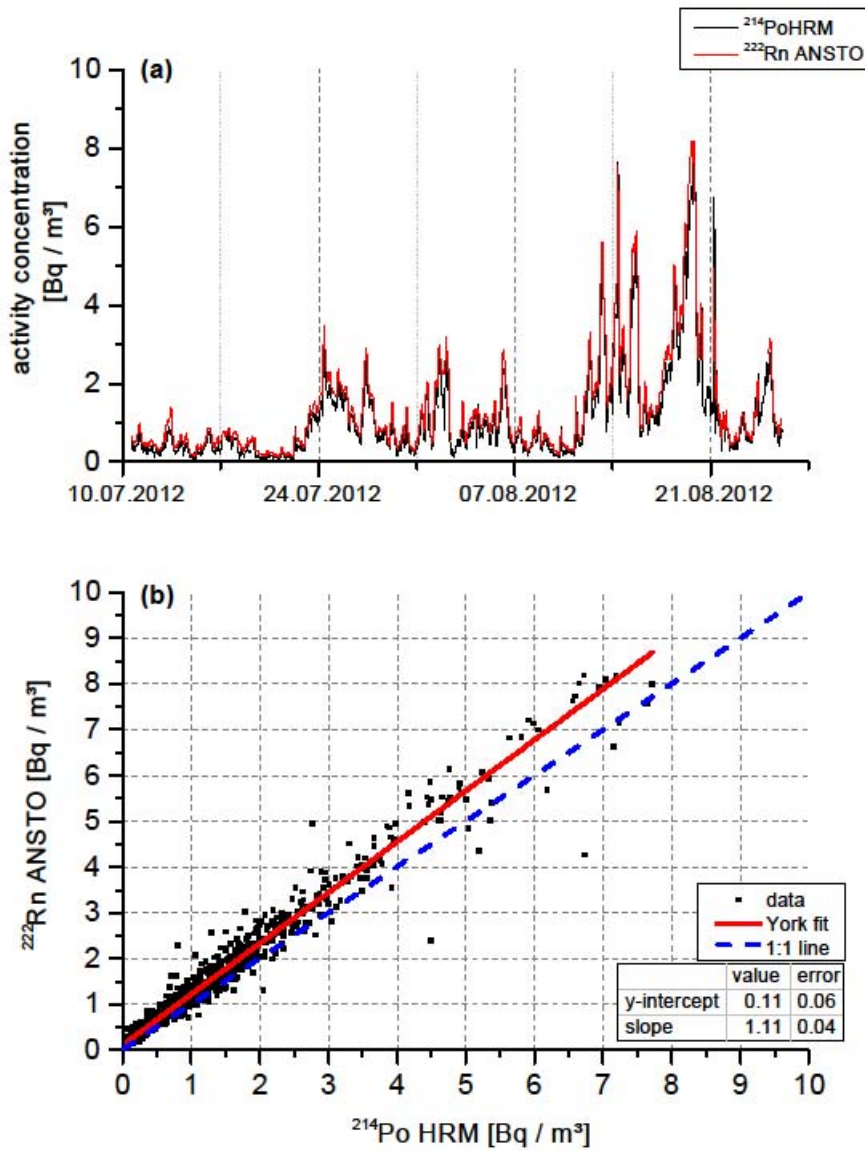

Figure S1: Comparison of Cabauw ANSTO <sup>222</sup>Rn at 200m with HRM <sup>214</sup>Po at 180m

### Cabauw 20m, 2012

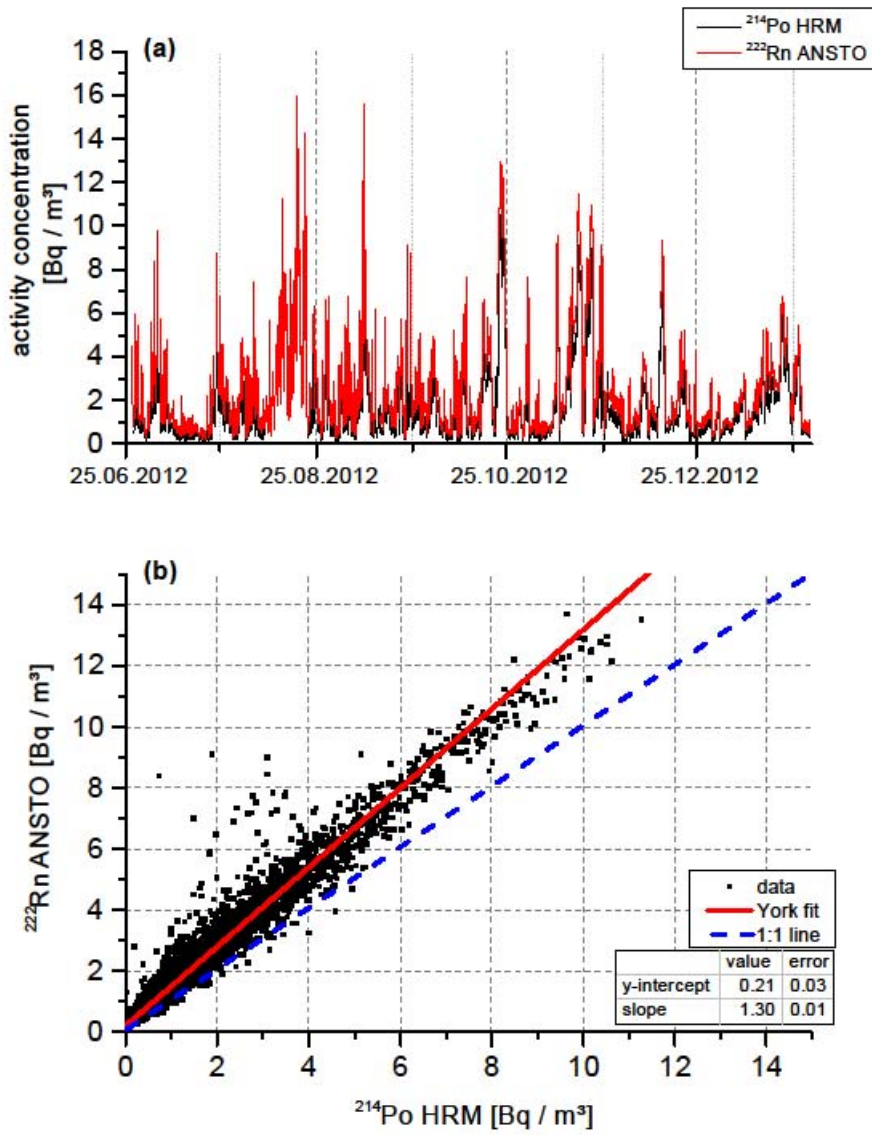

Figure S2: Comparison of Cabauw ANSTO  $^{222}\text{Rn}$  with HRM  $^{214}\text{Po}$ , both at 20m

Lutjewad 2007

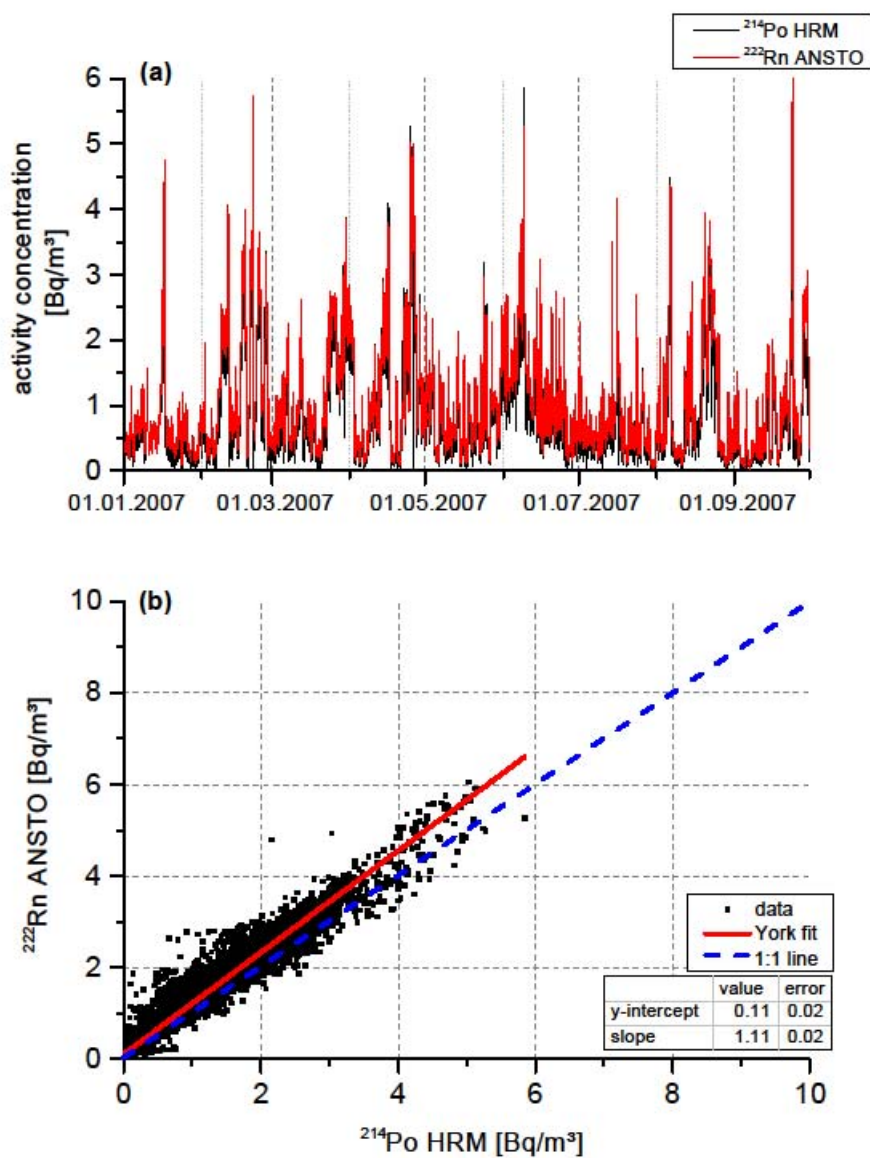

Figure S3: Comparison of Lutjewad ANSTO <sup>222</sup>Rn with HRM <sup>214</sup>Po, both at 60m

# Heidelberg 2015

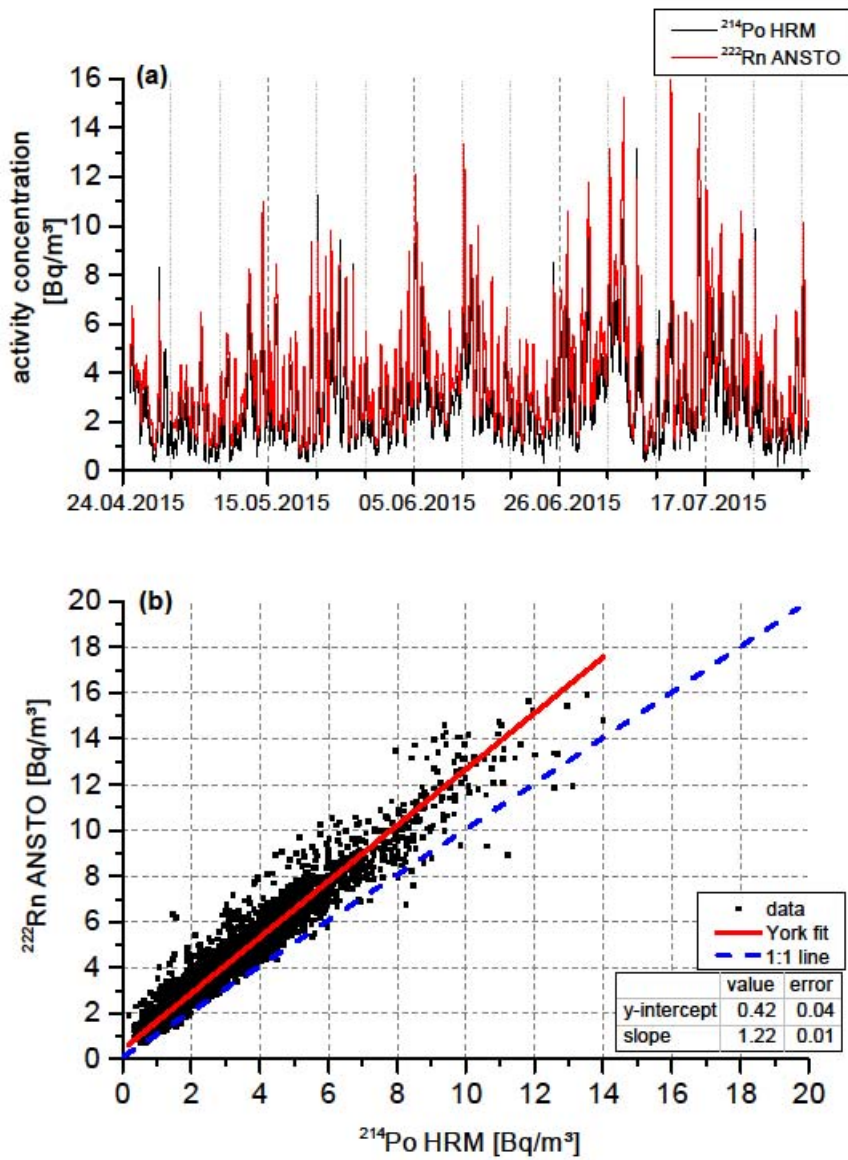

Figure S4: Comparison of Heidelberg ANSTO  $^{222}\text{Rn}$  with HRM  $^{214}\text{Po}$ , both at 35m

# Pallas 2014

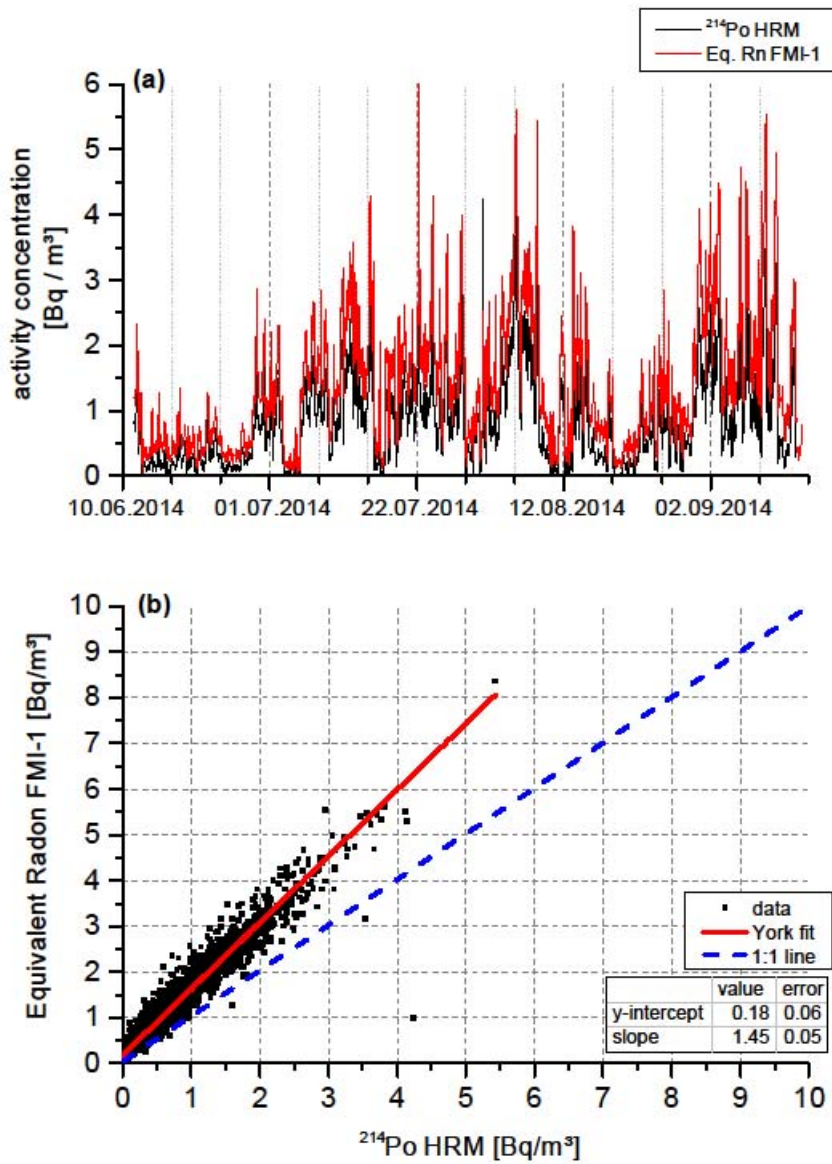

Figure S5: Comparison of Pallas FMI-1 <sup>214</sup>Pb- and <sup>214</sup>Bi-based equivalent <sup>222</sup>Rn with HRM <sup>214</sup>Po, both at 5m

## Helsinki May 2014

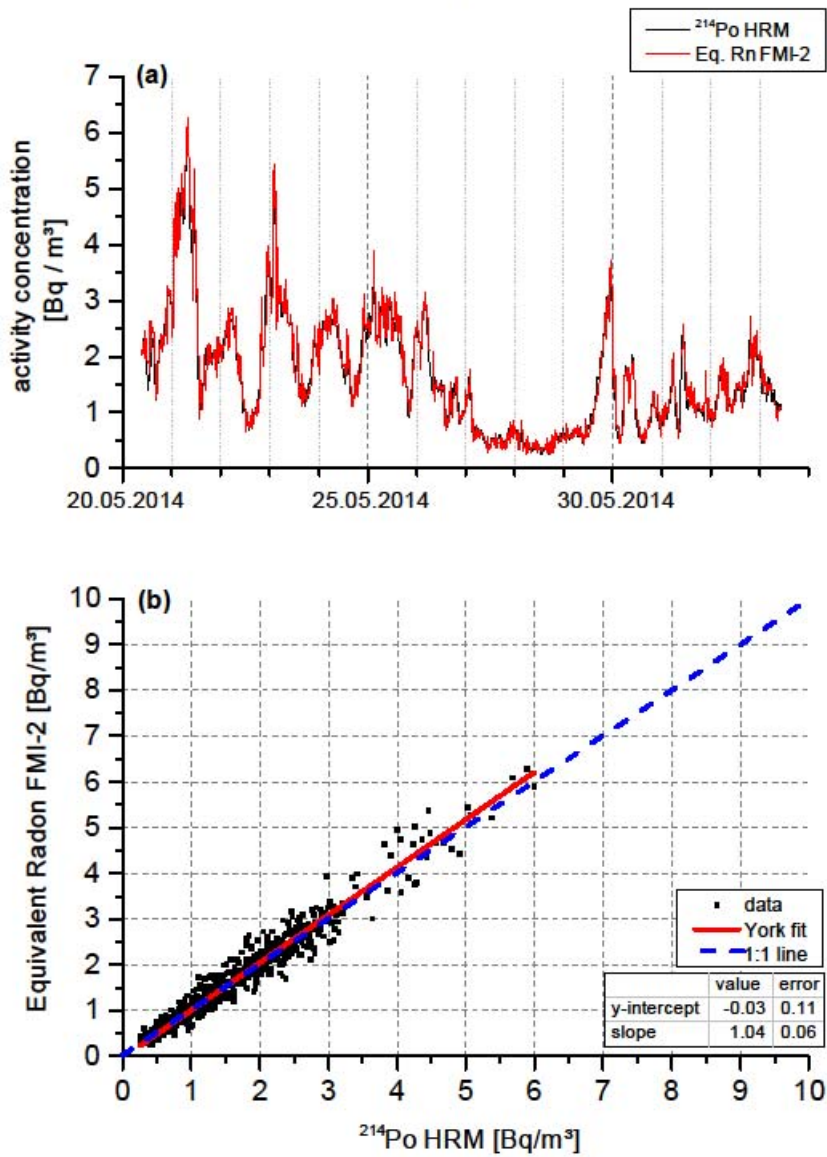

Figure S6: Comparison of Helsinki FMI-2 <sup>214</sup>Pb- and <sup>214</sup>Bi-based equivalent <sup>222</sup>Rn with HRM <sup>214</sup>Po, both at 27m

## Helsinki October 2014

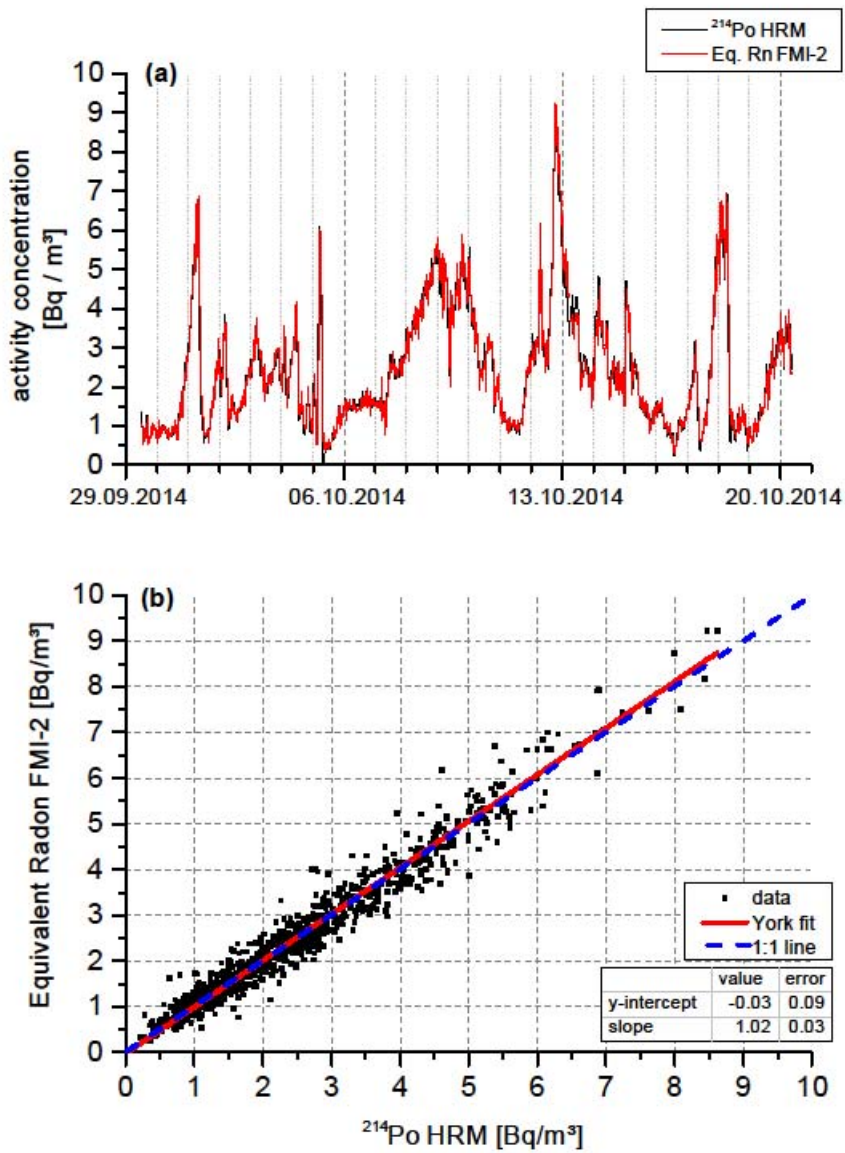

Figure S7: Second comparison of Helsinki FMI-2 <sup>214</sup>Pb- and <sup>214</sup>Bi-based equivalent <sup>222</sup>Rn with HRM <sup>214</sup>Po, both at 27m



## Mace Head 2014

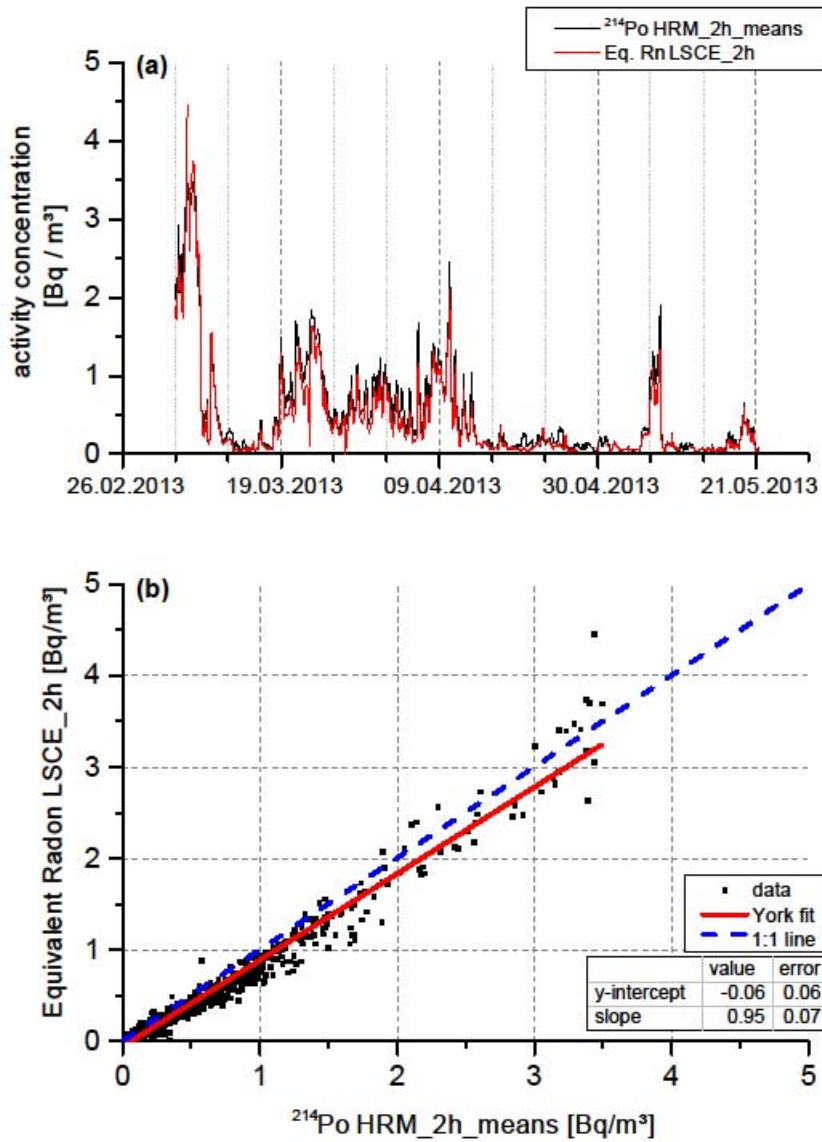

Figure S8: Comparison of Mace Head LSCE <sup>218</sup>Po- and <sup>214</sup>Po-based equivalent <sup>222</sup>Rn with HRM <sup>214</sup>Po, both at 5m

# GIF 2014

(blue data flagged, because of flux problems)

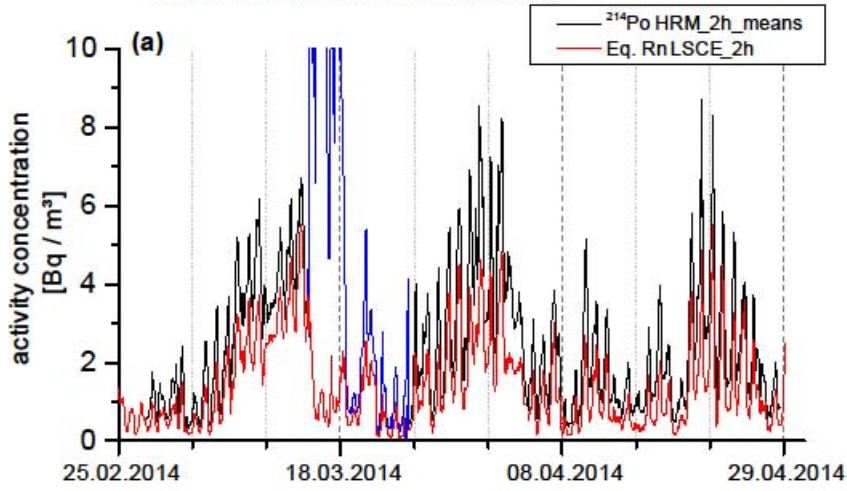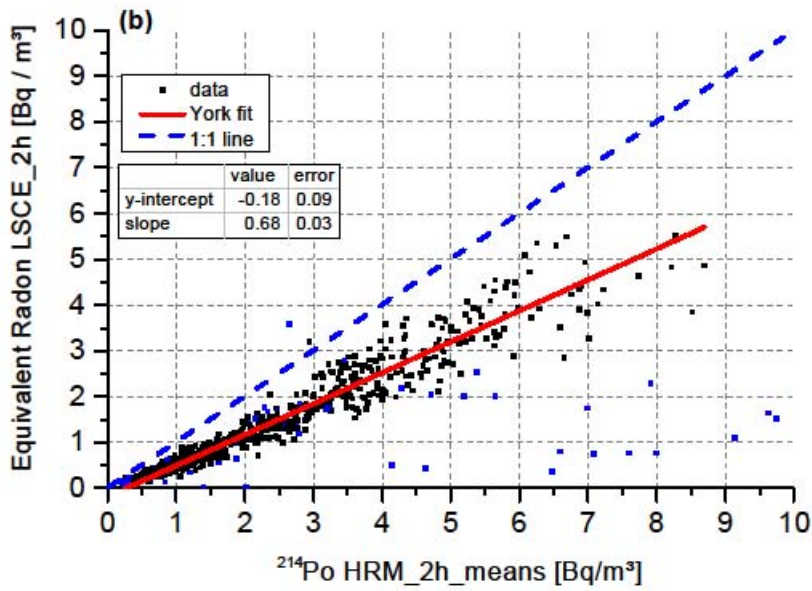

Figure S9: Comparison of Gif-sur-Yvette LSCE  $^{218}\text{Po}$ - and  $^{214}\text{Po}$ -based equivalent  $^{222}\text{Rn}$  with HRM  $^{214}\text{Po}$ , both at 2m

### BfS 2013, 5\_SIL2

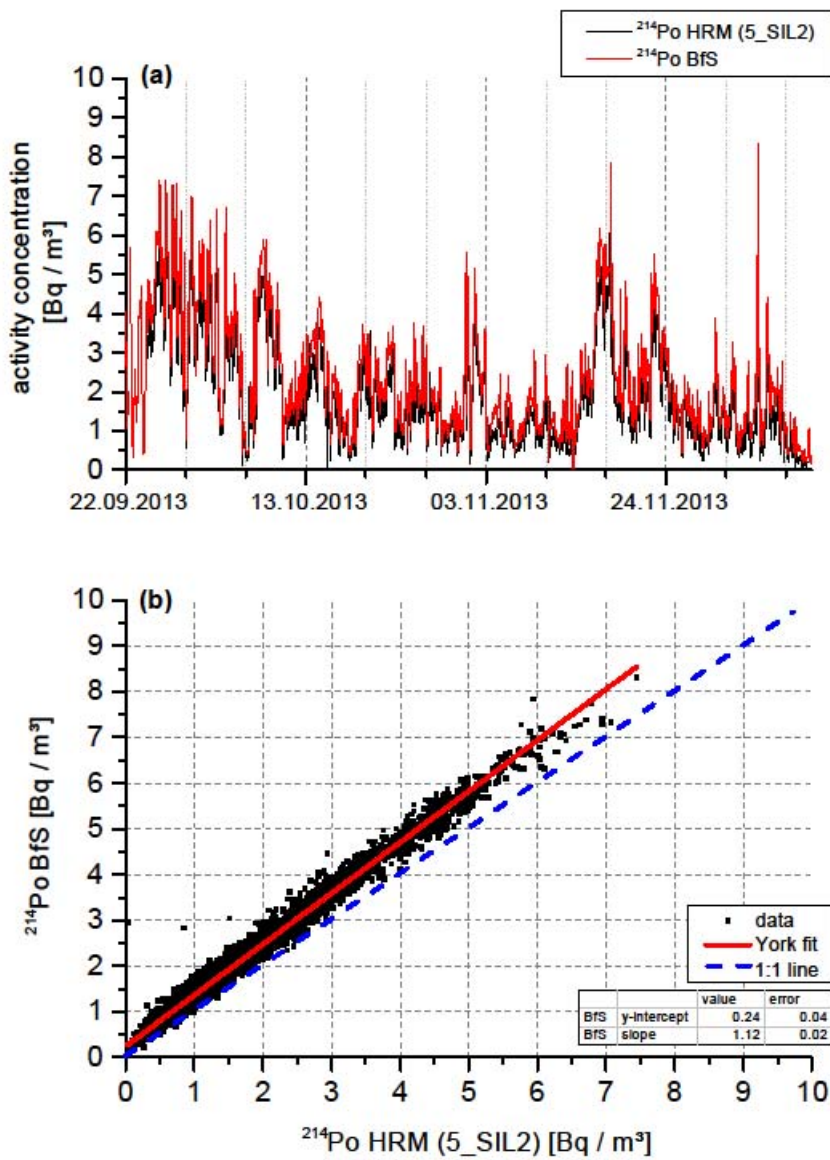

Figure S10: Comparison of Schauinsland BfS <sup>214</sup>Po with HRM (5\_SIL2) <sup>214</sup>Po, both at 2.5m

# BfS 2013, 9\_InGOS

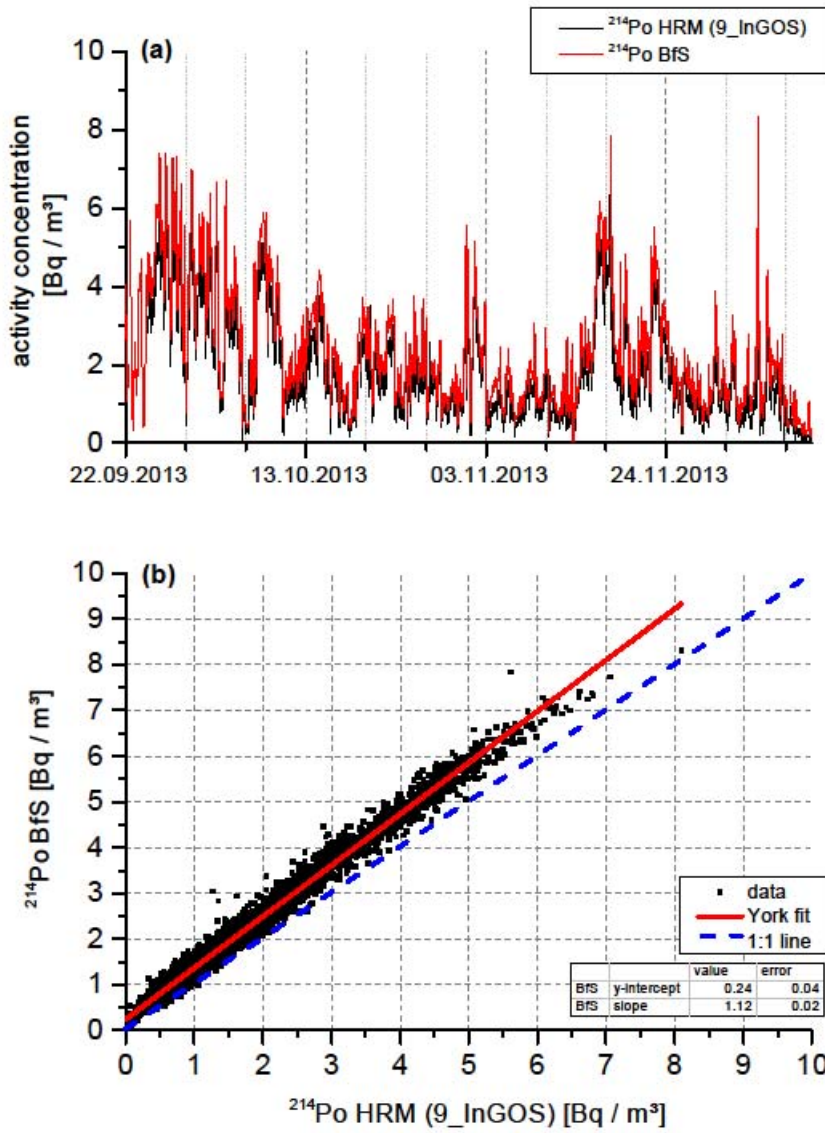

Figure S11: Comparison of Schauinsland BfS  $^{214}\text{Po}$  with HRM (9\_InGOS)  $^{214}\text{Po}$ , both at 2.5m

# HPB 2014

(blue data flagged because of frost flowers in the intake line)

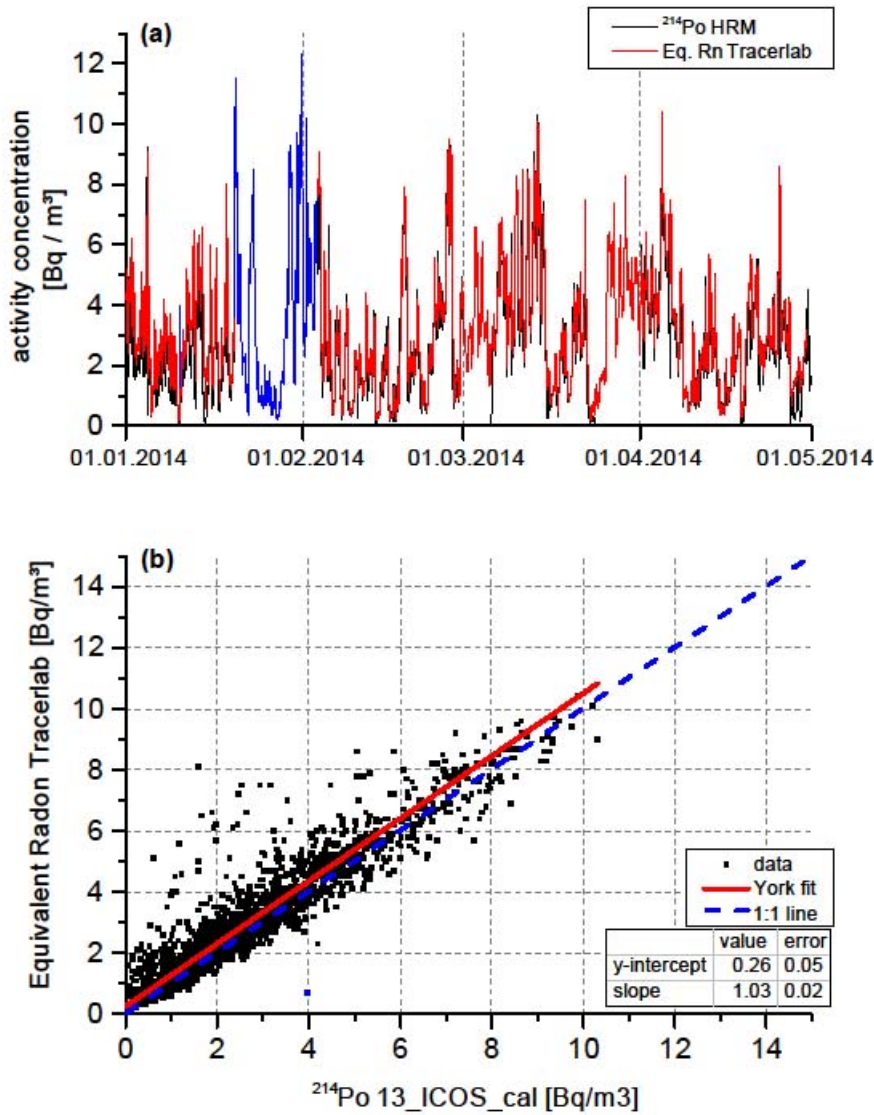

Figure S12: Comparison of Hohenpeißenberg TRACERLAB <sup>218</sup>Po- and <sup>214</sup>Po-based equivalent <sup>222</sup>Rn with HRM <sup>214</sup>Po, both at 10m
